# Supplementary material for: CellProfiler: image analysis software for identifying and quantifying cell phenotypes
Source: Springer Nature journal article supplement (doi:10.1186/gb-2006-7-10-r100), 2006-10-31
Supplement: Additional file 5 [file gb-2006-7-10-r100-s5.pdf]

Additional Data File 5: Data and image tools in CellProfiler, with their descriptions.

| <b>Data Tools</b>       | <b>Description</b>                                                                                                                                                                                 |
|-------------------------|----------------------------------------------------------------------------------------------------------------------------------------------------------------------------------------------------|
| AddData                 | Adds text information for each image to an output file (e.g. gene name, sample information).                                                                                                       |
| CalculateRatiosDataTool | Calculates the ratio between any measurements already measured (e.g. Intensity of green staining in cytoplasm/Area of cells)                                                                       |
| ClearData               | Removes information/measurements from an output file.                                                                                                                                              |
| ConvertBatchFiles       | Converts output files produced by the Create Batch Files module into regular CellProfiler output files.                                                                                            |
| DataLayout              | Shows mean measurements for each image in a specified spatial layout.                                                                                                                              |
| ExportData              | Exports measurements into a tab-delimited text file which can be opened in Excel or other spreadsheet programs.                                                                                    |
| ExportDatabase          | Exports measurements in database format.                                                                                                                                                           |
| ExportLocations         | Exports center locations of objects. Specialty function for creating a locations list for microscopy image acquisition of gridded spots.                                                           |
| GenerateHistogramMovie  | Creates a movie of the histogram of any measurement.                                                                                                                                               |
| Histogram               | Displays a histogram of individual object measurements.                                                                                                                                            |
| MeasurementCalculator   | Multiplies or divides measurements in output files.                                                                                                                                                |
| MergeOutputFiles        | Merges together output files produced by the Create Batch Files module into one regular CellProfiler output file.                                                                                  |
| PlotMeasurement         | Plots measured data in bar charts, line charts, or scatterplots.                                                                                                                                   |
| ShowDataOnImage         | Produces an image with measured data on top of identified objects.                                                                                                                                 |
| ViewData                | Displays data or measurements from a CellProfiler output file.                                                                                                                                     |
|                         |                                                                                                                                                                                                    |
| <b>Image tools</b>      | <b>Description</b>                                                                                                                                                                                 |
| ImageToolWindow         | The Image Tool Window opens when you click on any image and allows opening the image in a new window, displaying a pixel intensity histogram, measuring length in the image, and saving the image. |
| InteractiveZoom         | Allows interactive zooming over the image.                                                                                                                                                         |
| OpenNewImageFile        | Opens an image file in a new window.                                                                                                                                                               |
| ShowOrHidePixelData     | Shows X,Y pixel location and intensity information in the Fig window.                                                                                                                              |
